# Supplementary material for: Rapid assessment of the temporal function and phenotypic reversibility of neurodevelopmental disorder risk genes in Caenorhabditis elegans
Source: Oxford University Press journal article supplement (doi:10.1242/dmm.049359), 2022-04-01
Supplement: dmm049359supp.pdf [file dmm049359supp.pdf]

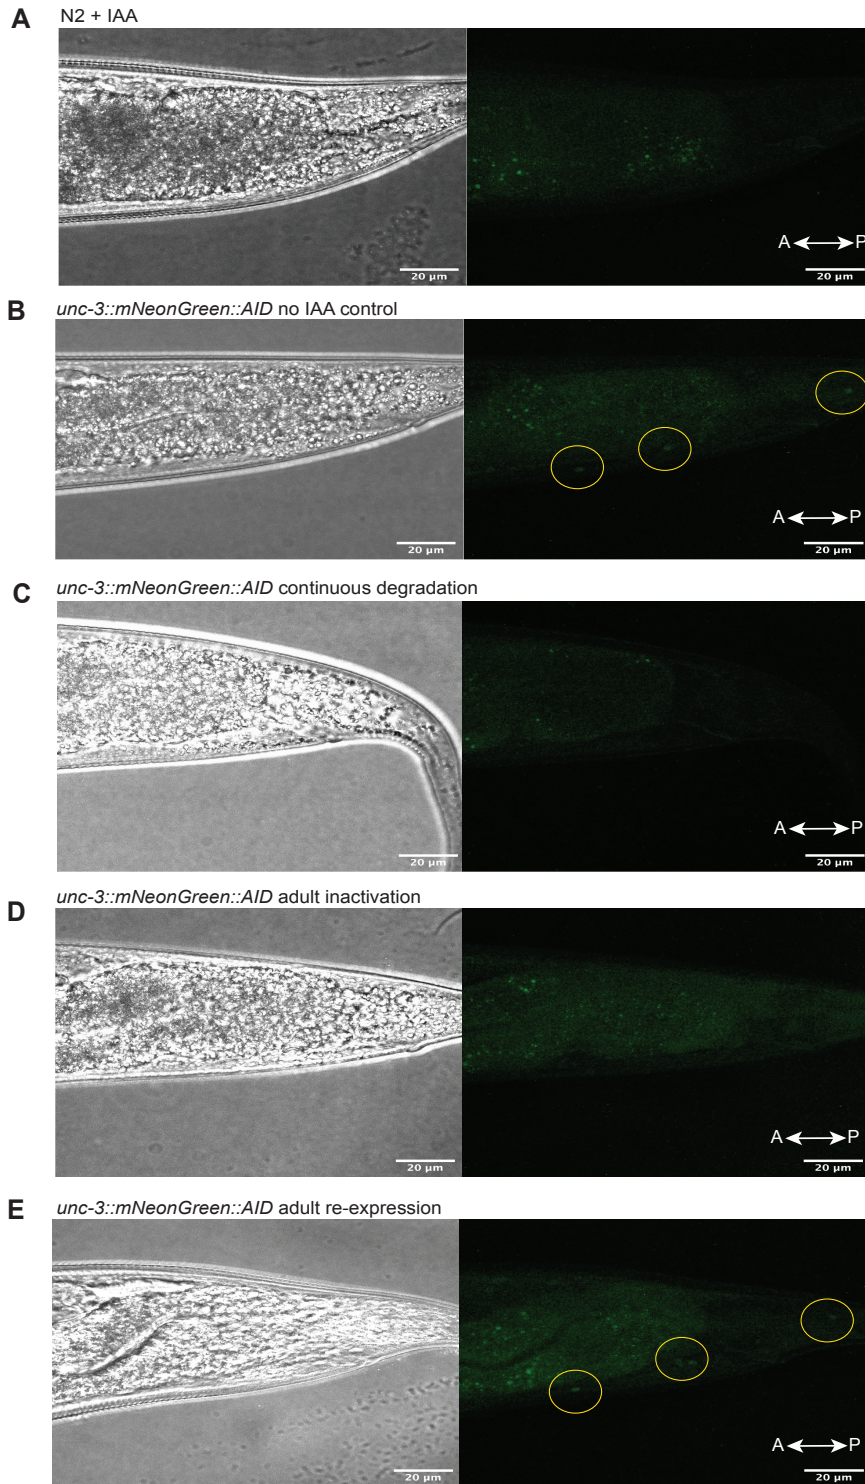

**Fig. S1. Expression of *UNC-3::mNeonGreen::AID* across temporal degradation conditions.** All images are taken when animals were 96hours old. A) N2 animal continuously grown in the presence of IAA. B) *UNC-3::mNeonGreen::AID* expression in the no-IAA control. Yellow circles highlight mNeonGreen fluorescence in neuron cell bodies in the *C. elegans* tail.

C) UNC-3::mNeonGreen::AID expression in animals continuously grown on IAA plates. No visible fluorescence was detected. D) UNC-3 expression in animals transferred to IAA plates at L4. There was no fluorescence visible, indicating efficient degradation of UNC-3 after 48 hours of IAA exposure. E) UNC-3::mNeonGreen::AID expression in animals taken off IAA plates at L4. mNeonGreen fluorescence was visible in neuron cell bodies (highlighted by yellow circles). Images representative of 4-5 animals scored for the presence of mNeonGreen.

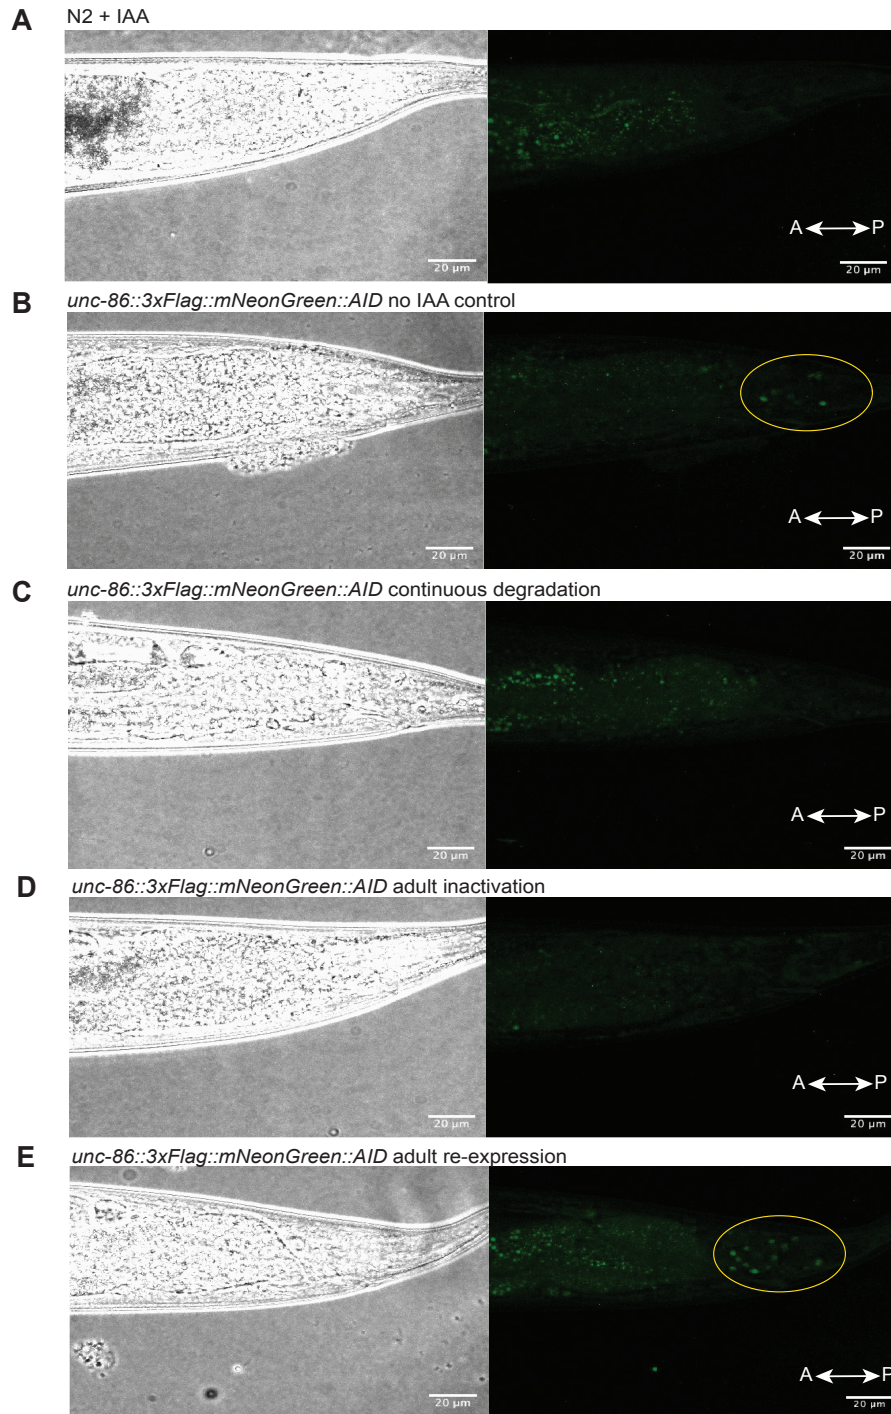

**Fig. S2. Expression of *UNC-86::3xFlag::mNeonGreen::AID* across temporal degradation conditions.** All images are taken when animals were 96hours old. A) N2 animal continuously grown in the presence of IAA. B) *UNC-86::3xFlag::mNeonGreen::AID* expression in the no-IAA control. Yellow circles highlight *mNeonGreen* fluorescence in neuron cell bodies in the *C. elegans* tail. C) *UNC-86::3xFlag::mNeonGreen::AID* expression in animals continuously

grown on IAA plates. No visible fluorescence was detected. D) UNC-86 expression in animals transferred to IAA plates at L4. There was no fluorescence visible, indicating efficient degradation of UNC-86 after 48 hours of IAA exposure. E) UNC-863xFlag::mNeonGreen::AID expression in animals taken off IAA plates at L4. mNeonGreen fluorescence was visible in neuron cell bodies (highlighted by yellow circles). Images representative of 4-5 animals scored for the presence of mNeonGreen.

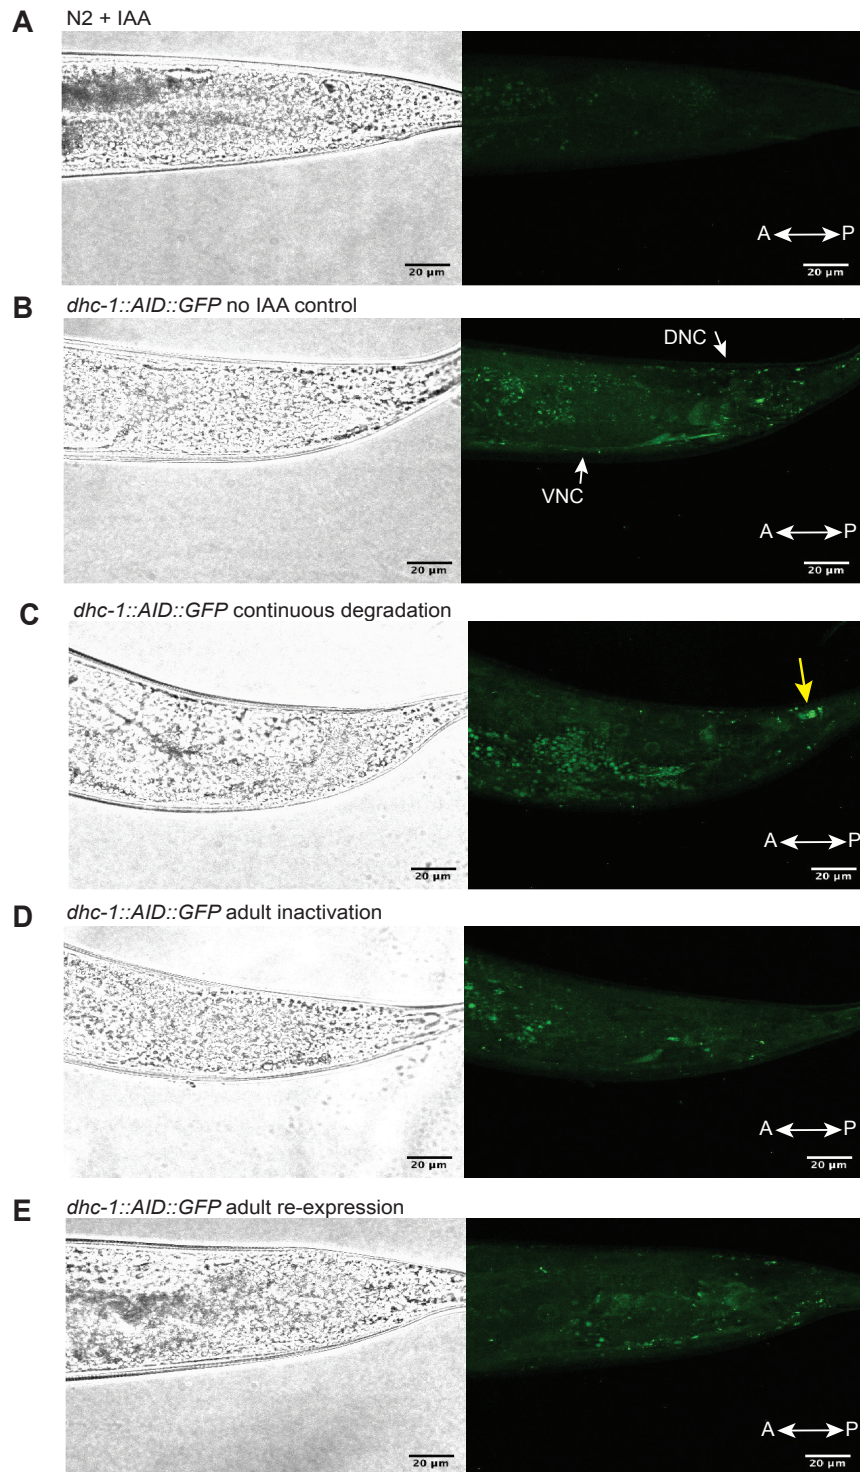

**Fig. S3. Expression of *DHC-1::AID::GFP* in neuron-specific temporal degradation conditions.** All images are taken when animals were 96hours old. A) N2 animal continuously grown in the presence of IAA. B) *DHC-1::AID::GFP* expression in the no-IAA control. Fluorescence was visible in the ventral nerve cord (VNC) and dorsal nerve cord (DNC). C)

DHC-1::AID::GFP expression in animals continuously exposed to IAA to induce protein degradation in neurons only. There was decreased fluorescence in the nerve cords, and abnormal aggregation on GFP in the tail (highlighted by yellow arrow). D) DHC-1::AID::GFP expression in animals transferred to IAA plates at L4 to induce adult degradation. There was decreased GFP fluorescence in the VNC and DNC. E) DHC-1::AID::GFP expression in animals taken off IAA plates at L4. GFP fluorescence was visible in the VNC and DNC. Images representative of 4-5 animals scored for the presence of GFP.

**A**

**FPKM expression data from selected modENCODE libraries:**

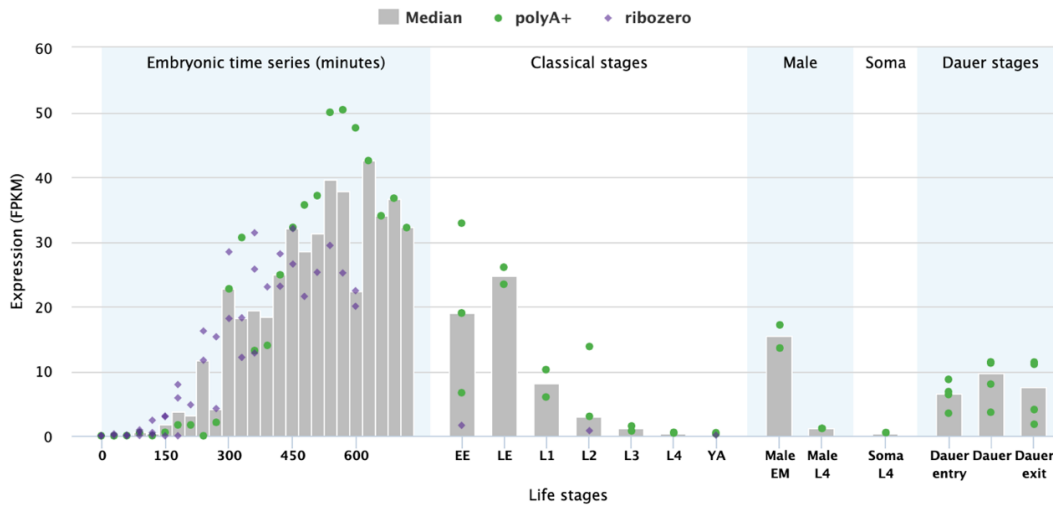

This shows the FPKM expression values of PolyA+ and Ribozero modENCODE libraries across life-stages. The bars show the median value of the libraries plotted. Other modENCODE libraries which were made using other protocols or which are from a particular tissue or attack by a pathogen have been excluded.

**B**

**FPKM expression data from selected modENCODE libraries:**

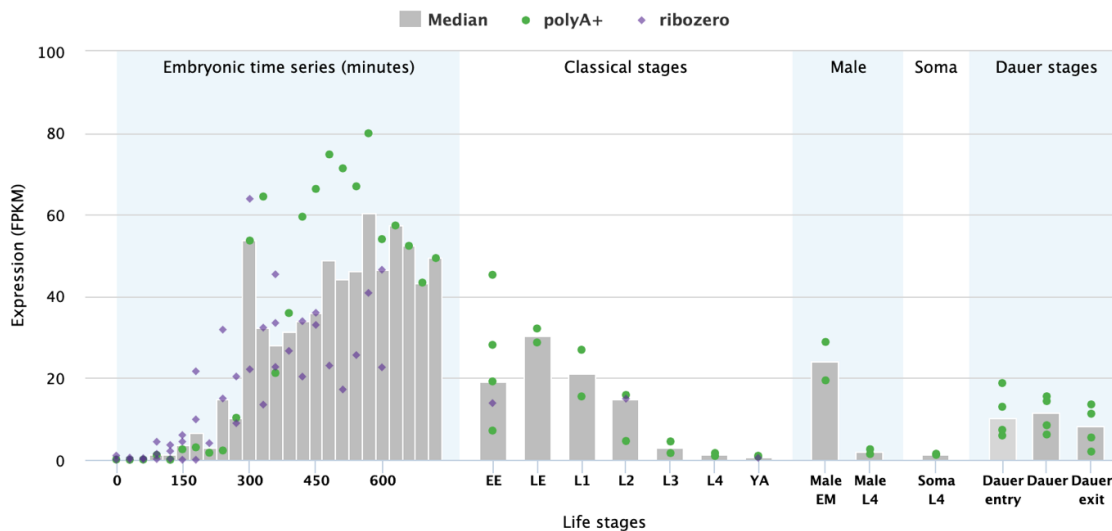

This shows the FPKM expression values of PolyA+ and Ribozero modENCODE libraries across life-stages. The bars show the median value of the libraries plotted. Other modENCODE libraries which were made using other protocols or which are from a particular tissue or attack by a pathogen have been excluded.

**Fig. S4. *unc-3* and *unc-86* have a similar pattern of expression across the lifespan. A)** Expression pattern of *unc-3* across the *C. elegans* lifespan. **B)** Expression pattern of *unc-86* across the *C. elegans* lifespan. Downloaded from Wormbase.org (Gerstein et al., 2010). Both transcription factors show high expression in embryonic and early larval development, with lower expression in late development and adulthood. FPKM (fragments per kilobase of transcript per million mapped reads).

**Table S1. Phenotypic feature descriptions.**

| Feature        | Description                                                                                                                                                                                                                                                          |
|----------------|----------------------------------------------------------------------------------------------------------------------------------------------------------------------------------------------------------------------------------------------------------------------|
| Width          | The distance spanned perpendicular to the major axis, in mm.                                                                                                                                                                                                         |
| Length         | The distance spanned by objects along their major axis (defined to be the axis of a least squares fit), in mm.                                                                                                                                                       |
| Morph Width    | The mean width of the central 60% of the object, measured perpendicular to the skeleton. This is only available if the object has a skeleton.                                                                                                                        |
| Curve          | The average angle, in radians, of points along the object's skeleton taken two apart. This measure is only available if skeletons exist.                                                                                                                             |
| Area           | The area in square millimeters of objects                                                                                                                                                                                                                            |
| Midline Length | The length of the object, in mm, measured along the skeleton; this is only available if skeletons were collected (or outlines were collected, and skeletons were generated with a plugin).                                                                           |
| Path Length    | The distance that the animal has traveled. This is both signed (forwards is positive, backwards is negative) based on the results of the "bias" output and cumulative. If movement direction cannot be computed, then the length starts again from zero.             |
| Bias           | The fraction of objects moving in the dominant movement direction as opposed to the other direction. The dominant direction is labeled 1, the opposite 1, and stationary objects are 0. This is usually inaccurate unless the segment (S) option is used.            |
| Direction      | The frequency of changes in direction. Forward motion is 1; motion that backtracks is 1 at the point of turning. This metric is somewhat unreliable unless segment (S) is used.                                                                                      |
| Angular Speed  | The angular speed in radians/second of objects; this is calculated over the same interval as speed, but reports the greatest difference in angle between primary axes over that time                                                                                 |
| Aspect         | The ratio of the width to length                                                                                                                                                                                                                                     |
| Kink           | The angle in radians between the line from the first to third point of the skeleton and the fourth through last points; or the angle between first and fourth to last and third to last to last, whichever is greater. This is similar to the MWT endwiggle measure. |
| Crab           | The speed perpendicular to the length of the body, in mm/sec, averaged as specified by s. Note that the speed along the length of the body is $\sqrt{\text{speed}^2 - \text{crab}^2}$ .                                                                              |
|                | The speed in mm/second of objects. This speed is averaged over the duration given in the s parameter; it is equal to the distance between the                                                                                                                        |



|                                              |                                                                                                                                                                      |
|----------------------------------------------|----------------------------------------------------------------------------------------------------------------------------------------------------------------------|
| Baseline Speed                               | most widely spaced pair of points over that period of time (half ahead of and half behind the current timepoint) divided by that duration.                           |
| Initial Reversal Response Probability        | The proportion of animals reversing to the first mechanosensory stimulus.                                                                                            |
| Initial Reversal Response Duration           | The duration of reversal responses to the first mechanosensory stimulus                                                                                              |
| Initial Reversal Response Speed              | The speed of reversal responses to the first mechanosensory stimulus                                                                                                 |
| Initial Reversal Response Distance           | The distance (mm) of reversal responses to the first mechanosensory stimulus                                                                                         |
| Habituation of Response Probability          | The difference between the initial reversal response probability and the final habituated level of response probability (average of 28-30th responses).              |
| Habituation of Response Duration             | The difference between the initial reversal response duration and the final habituated level of response duration (average of 28-30th responses).                    |
| Habituation of Response Speed                | The difference between the initial reversal response speed and the final habituated level of response speed (average of 28-30th responses).                          |
| Habituation of Response Distance             | The difference between the initial reversal response distance and the final habituated level of response distance (average of 28-30th responses).                    |
| Mean Response Probability                    | The mean reversal response probability across the habituation paradigm (average of all responses).                                                                   |
| Mean Response Duration                       | The mean reversal response duration across the habituation paradigm (average of all responses).                                                                      |
| Mean Response Speed                          | The mean reversal response speed across the habituation paradigm (average of all responses).                                                                         |
| Mean Response Distance                       | The mean reversal response distance across the habituation paradigm (average of all responses).                                                                      |
| Spontaneous Recovery of Response Probability | The reversal response probability to the 31 <sup>st</sup> stimulus (delivered 5 minutes after the habituation session to gauge spontaneous recovery of habituation). |
| Spontaneous Recovery of Response Duration    | The reversal response duration to the 31 <sup>st</sup> stimulus (delivered 5 minutes after the habituation session to gauge spontaneous recovery of habituation).    |

|                                           |                                                                                                                                                                   |
|-------------------------------------------|-------------------------------------------------------------------------------------------------------------------------------------------------------------------|
|                                           |                                                                                                                                                                   |
| Spontaneous Recovery of Response Speed    | The reversal response speed to the 31 <sup>st</sup> stimulus (delivered 5 minutes after the habituation session to gauge spontaneous recovery of habituation).    |
| Spontaneous Recovery of Response Distance | The reversal response distance to the 31 <sup>st</sup> stimulus (delivered 5 minutes after the habituation session to gauge spontaneous recovery of habituation). |
